# Supplementary material for: Human Skin, Oral, and Gut Microbiomes Predict Chronological Age
Source: PubMed Central journal article supplement (PMC7018528; doi:10.1128/msystems.00630-19), 2020-02-11

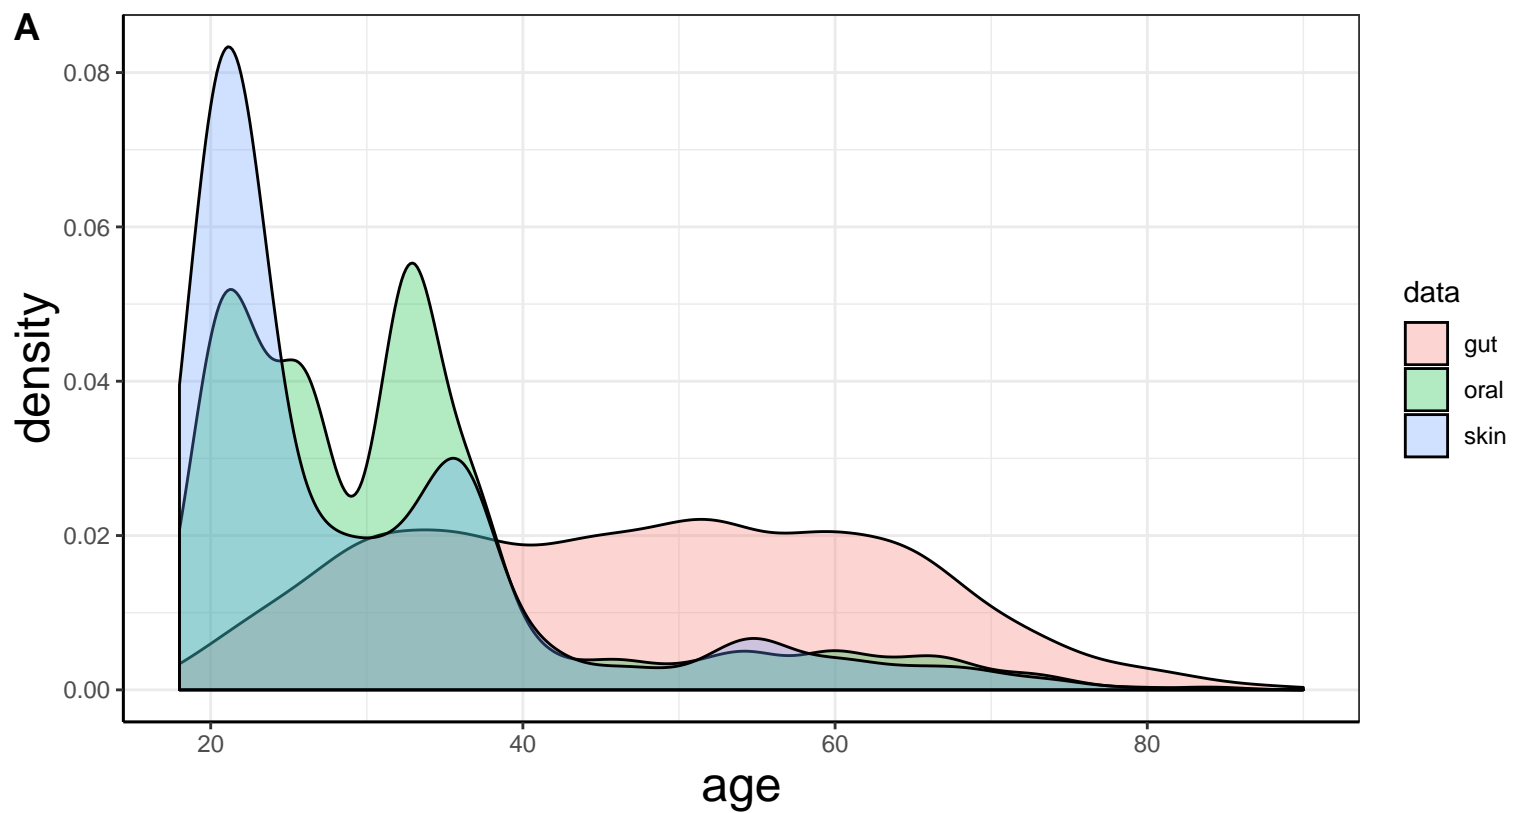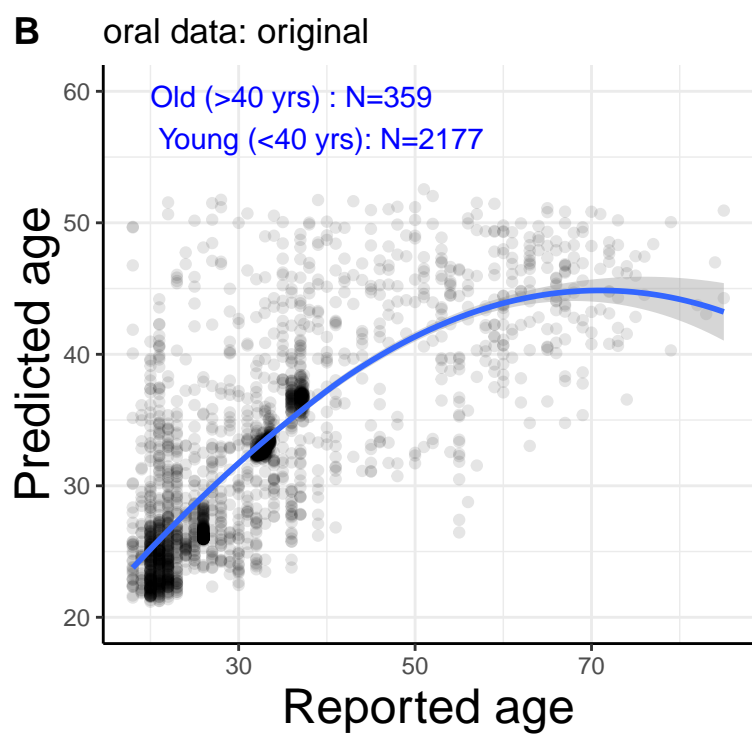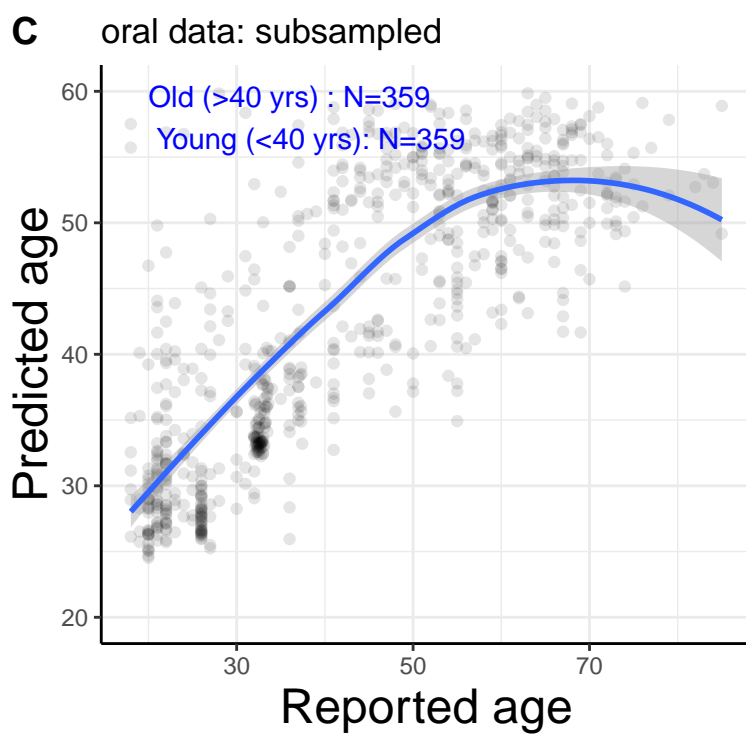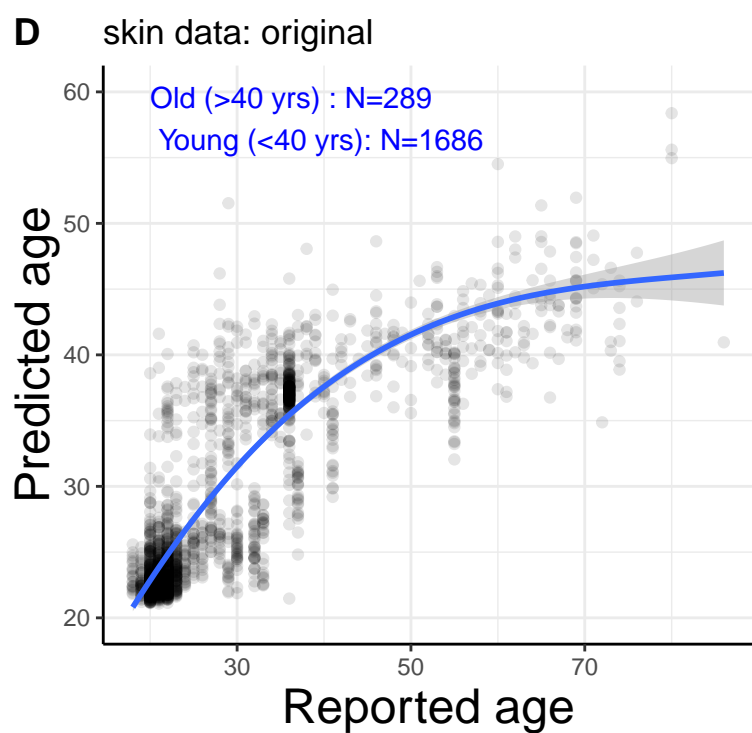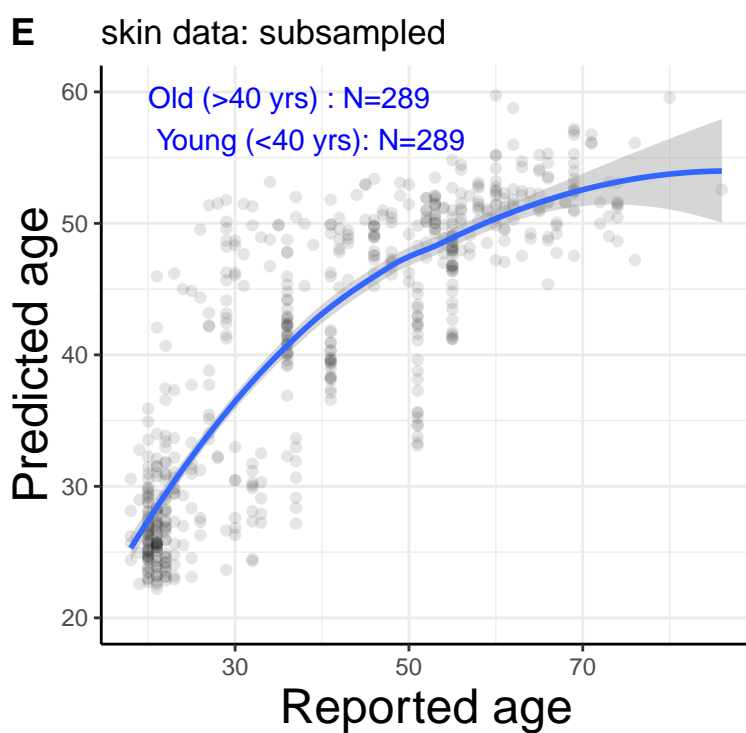

Supplement: mSystems.00630-19-sf001.pdf [file mSystems.00630-19-sf001.pdf]
